# Supplementary material
Source: PubMed Central journal article supplement (PMC4775442)

**Supplemental Figure 1. Flow diagram**

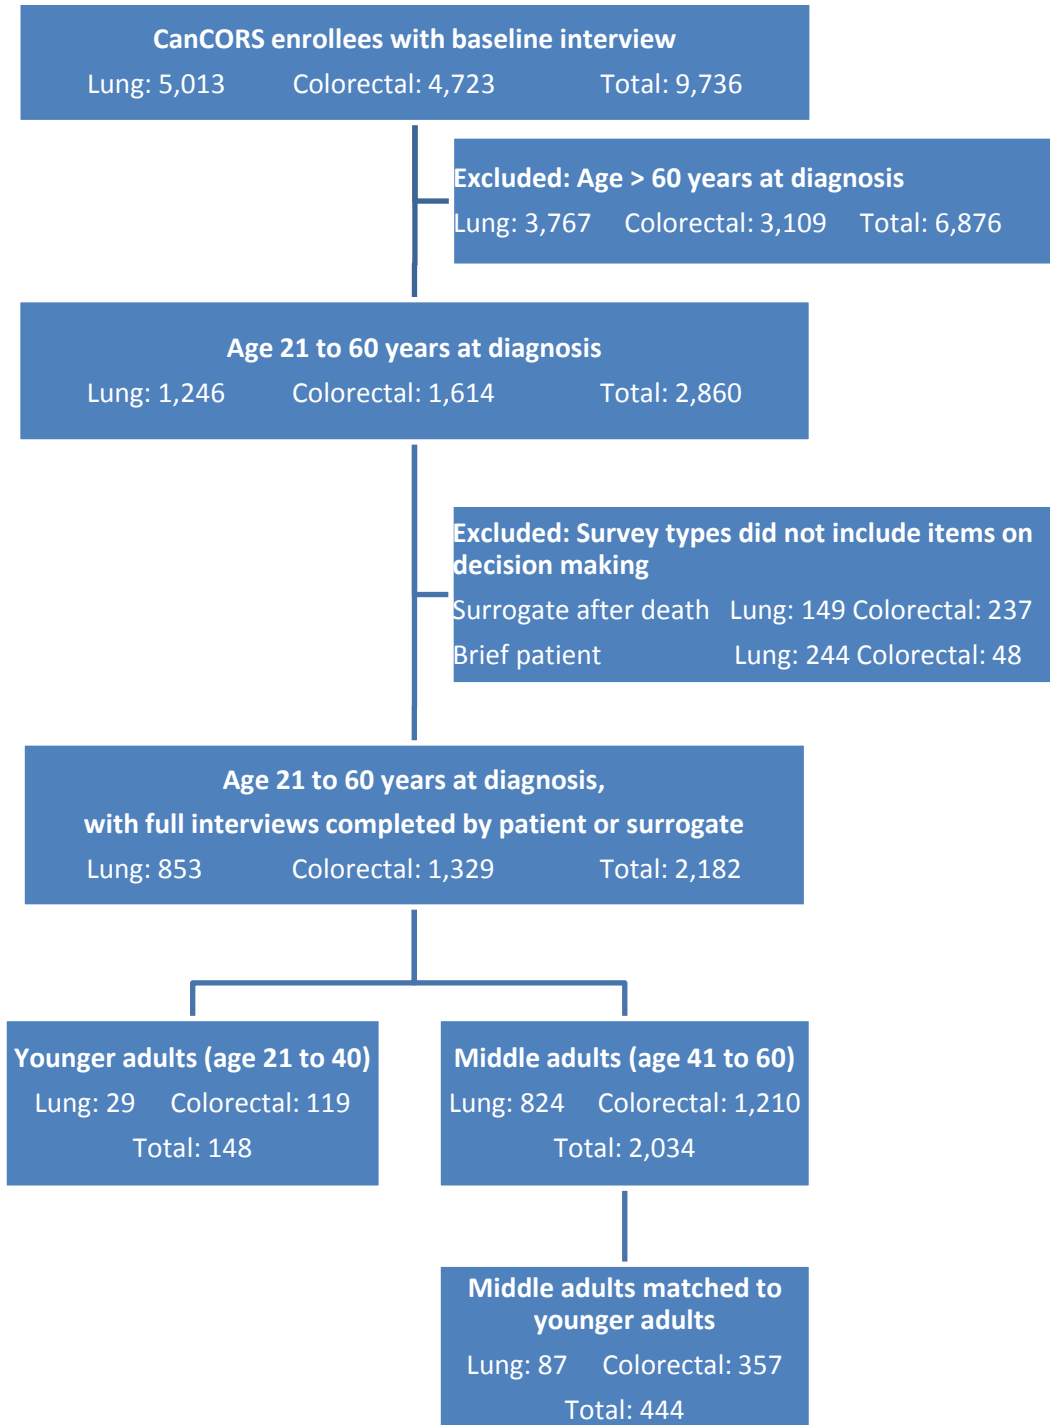

Supplement: NIHMS727398-supplement-supplement_1.pdf [file NIHMS727398-supplement-supplement_1.pdf]
